# 1 **Tetravalent SARS-CoV-2 Neutralizing Antibodies Show Enhanced Potency** 2 **and Resistance to Escape Mutations**

3  
4 Shane Miersch<sup>1,13</sup>, Zhijie Li<sup>2,13</sup>, Reza Saberianfar<sup>1</sup>, Mart Ustav<sup>3</sup>, James Brett Case<sup>4</sup>, Levi Blazer<sup>1</sup>,  
5 Chao Chen<sup>1</sup>, Wei Ye<sup>1</sup>, Alevtina Pavlenco<sup>1</sup>, Maryna Gorelik<sup>1</sup>, Julia Garcia Perez<sup>1</sup>, Suryasree  
6 Subramania<sup>1</sup>, Serena Singh<sup>1</sup>, Lynda Ploder<sup>1</sup>, Safder Ganaie<sup>4</sup>, Rita E. Chen<sup>4,12</sup>, Daisy W. Leung<sup>4</sup>  
7 Pier Paolo Pandolfi<sup>5,6</sup>, Giuseppe Novelli<sup>7</sup>, Giulia Matusali<sup>8</sup>, Francesca Colavita<sup>8</sup>, Maria R.  
8 Capobianchi<sup>8</sup>, Suresh Jain<sup>9</sup>, J.B. Gupta<sup>9</sup>, Gaya K. Amarasinghe<sup>12</sup>, Michael S. Diamond<sup>4,11,12</sup>,  
9 James Rini<sup>2,10\*</sup>, Sachdev S. Sidhu<sup>1\*</sup>

10

## 11 Affiliations

12 1 - The Donnelly Centre, University of Toronto, Toronto, Canada

13 2 - Department of Molecular Genetics, University of Toronto, Toronto, Canada

14 3 - Icosagen, Õssu, Estonia

15 4 - Department of Medicine, Washington University School of Medicine, St. Louis, MO, USA

16 5 - Renown Institute for Cancer, Nevada System of Higher Education, Reno, NV, USA.

17 6 - Department of Molecular Biotechnologies & Health Sciences, Molecular Biotechnology Center,  
18 University of Turin, Italy

19 7 - Department of Biomedicine and Prevention, Tor Vergata University of Rome, 00133, Rome,  
20 Italy

21 8 - Laboratory of Virology, National Institute for Infectious Diseases "L. Spallanzani" IRCCS,  
22 Rome, Italy

23 9 - Virna Therapeutics, West Roxbury, MA, USA

24 10 - Department of Biochemistry, University of Toronto, Toronto, Canada

25 11 – Department of Molecular Microbiology, Washington University School of Medicine, St.  
26 Louis, MO, USA

27 12 - Department of Pathology and Immunology, Washington University School of Medicine, St.  
28 Louis, MO, USA

29

30 13 - The authors contributed equally

31 \* - Corresponding author

32 Corresponding authors email: [james.rini@utoronto.ca](mailto:james.rini@utoronto.ca) and [sachdev.sidhu@utoronto.ca](mailto:sachdev.sidhu@utoronto.ca)

33

34

35

36 **SUMMARY**

37 Neutralizing antibodies (nAbs) hold promise as effective therapeutics against COVID-19. Here,  
38 we describe protein engineering and modular design principles that have led to the development  
39 of synthetic bivalent and tetravalent nAbs against SARS-CoV-2. The best nAb targets the host  
40 receptor binding site of the viral S-protein and its tetravalent versions can block entry with a  
41 potency that exceeds the bivalent nAbs by an order of magnitude. Structural studies show that  
42 both the bivalent and tetravalent nAbs can make multivalent interactions with a single S-protein  
43 trimer, observations consistent with the avidity and potency of these molecules. Significantly, we  
44 show that the tetravalent nAbs show much increased tolerance to potential virus escape mutants.  
45 Bivalent and tetravalent nAbs can be produced at large-scale and are as stable and specific as  
46 approved antibody drugs. Our results provide a general framework for developing potent antiviral  
47 therapies against COVID-19 and related viral threats, and our strategy can be readily applied to  
48 any antibody drug currently in development.

49

50

## 51 INTRODUCTION

52 As of December 10, 2020, the ongoing COVID-19 viral pandemic has tallied more than  
53 68,000,000 confirmed cases and caused over 1,550,000 deaths ([www.who.int](http://www.who.int)). Moreover, the  
54 highly infectious nature of the disease has imposed severe global economic hardship due to the  
55 need for social distancing and lockdown measures. A number of repurposed drugs have shown  
56 only limited or uncertain efficacy against COVID-19 (Beigel et al., 2020; Boulware et al., 2020).  
57 Although licensed vaccines are now emerging (Poland et al., 2020), their effectiveness across  
58 demographics, their availability worldwide, and how well they will be adopted by the public at large  
59 remains an unknown. Almost certainly, COVID-19 will remain a serious human health concern  
60 for the foreseeable future and there is an urgent need for the development of therapeutics capable  
61 of treating patients and those at high risk for infection and/or with a poor prognosis.

62 Several lines of evidence suggest that SARS-CoV-2 neutralizing antibodies (nAbs) that  
63 bind directly to the virus spike glycoprotein and inhibit entry into host cells have therapeutic  
64 potential. First, many infected individuals either remain asymptomatic or recover rapidly with only  
65 minimal symptoms, and the plasma from these convalescent patients usually contains nAbs (Long  
66 et al., 2020; Robbiani et al., 2020). Second, transfer of plasma containing nAbs from convalescent  
67 patients to symptomatic patients has been beneficial in some cases (Duan et al., 2020; Li et al.,  
68 2020; Shen et al., 2020). Third, recombinant nAbs that inhibit the interaction between SARS-CoV-  
69 2 and host cells confer protection in cell-based assays and animal models (Alsoussi et al., 2020;  
70 Shi et al., 2020), and efficacy has also been observed for nAbs targeting the related coronaviruses  
71 SARS-CoV (Meulen et al., 2004; Sui et al., 2004; Zhu et al., 2007) and MERS (Corti et al., 2015).  
72 Consequently, a number of nAbs have entered clinical trials as post-infection treatment of COVID-  
73 19 associated with SARS-CoV-2 (Clinicaltrials.gov - [NCT04452318](https://clinicaltrials.gov/ct2/show/study/NCT04452318), [NCT04497987](https://clinicaltrials.gov/ct2/show/study/NCT04497987)), with some  
74 ([Bamlanivimab](#), [Casirivimab](#), and [Imdevimab](#)) receiving Emergency Use Authorization for  
75 treatment of mildly ill subjects.

76 SARS-CoV-2 virions contain 25-100 glycosylated spike (S) proteins that protrude from the  
77 viral membrane (Ke et al., 2020; Klein et al., 2020). The S-protein binds to the host cell protein,  
78 angiotensin-converting enzyme 2 (ACE2), to mediate viral entry (Hoffmann et al., 2020). The S-  
79 protein is a homotrimer and each of its three receptor binding domains (RBD) can be found in  
80 either the "up" or the "down" conformation, the former required for ACE2 binding. The most potent  
81 nAbs against both SARS-CoV-2 and SARS-CoV bind to the RBD and sterically block its  
82 interaction with ACE2 (Cao et al., 2020b; Hansen et al., 2020; Pinto et al.; Rogers et al., 2020;  
83 Wan et al., 2020). Consequently, we focused our efforts on developing nAbs that bound to the  
84 RBD and competed with ACE2.

85           To date, all clinically advanced candidate nAbs against SARS-CoV-2 infection have been  
86 derived by cloning from B cells of recovered COVID-19 patients or from other natural sources  
87 (Cao et al., 2020b; Hansen et al., 2020; Noy-Porat et al., 2020; Rogers et al., 2020; Shi et al.,  
88 2020; Wan et al., 2020; Wec et al., 2020). Here, we applied an alternative strategy using *in vitro*  
89 selection with phage-displayed libraries of synthetic Abs built on a single human IgG framework  
90 derived from a clinically validated drug, trastuzumab (Cobleigh et al., 1999). This approach  
91 enabled the rapid production of high affinity nAbs with drug-like properties ready for pre-clinical  
92 assessment. Moreover, the use of a highly stable framework enabled facile and modular design  
93 of ultra-high-affinity nAbs in tetravalent formats that retained favorable drug-like properties while  
94 exhibiting neutralization potencies that greatly exceeded those of the bivalent IgG format. Our  
95 tetravalent platform provides a general approach for rapidly improving the potency of virtually any  
96 nAb targeting pathogen-related receptor binding proteins, including SARS-CoV-2 and related  
97 coronaviruses. Thus, our strategy can improve existing COVID-19 nAb drugs and can be adapted  
98 in response to resistant mutations or to future viral threats.  
99  
100

## 101 RESULTS

102

### 103 Engineering of anti-RBD Fabs and IgGs

104 Using a phage-displayed human antigen-binding fragment (Fab) library similar to the  
105 highly validated library F (Persson et al., 2013), we performed four rounds of selection for binding  
106 to the biotinylated RBD of the S-protein of SARS-CoV-2 immobilized on streptavidin-coated  
107 plates. Screening of 384 Fab-phage clones revealed 348 that bound to the RBD but not to  
108 streptavidin. The Fab-phage were screened by ELISA and those exhibiting >50% loss of binding  
109 to the RBD in the presence of 200 nM ACE2 were sequenced, resulting in 34 unique clones (**Fig.**  
110 **1A**) that were converted into the full-length human IgG1 format for purification and functional  
111 characterization.

112 To determine relative binding strength, ELISAs were performed with serial dilutions of IgG  
113 protein binding to biotinylated S-protein trimer captured with immobilized streptavidin. These  
114 assays showed that three IgGs bound with  $EC_{50}$  values in the sub-nanomolar range (**Fig. 1B, C**  
115 **and Table 1**). Each IgG also partially blocked the binding of biotinylated ACE2 to immobilized S-  
116 protein (**Fig. 1D**). Moreover, similar to the highly specific IgG trastuzumab, these three IgGs did  
117 not bind to seven immobilized, heterologous proteins that are known to exhibit high non-specific  
118 binding to some IgGs. The observed lack of binding to these heterologous proteins is a predictor  
119 of good pharmacokinetics *in vivo* (**Fig. 1E**) (Jain et al., 2017; Mouquet et al., 2010). We also used  
120 biolayer interferometry (BLI) to measure binding kinetics and to determine avidities more  
121 accurately. All three antibodies exhibited sub-nanomolar  $K_D$  apparent (**Table 1**), in agreement  
122 with the estimates determined by ELISA (**Fig. 1C**). Among these, IgG 15033 exhibited the highest  
123 avidity, which was mainly due to a two- or seven-fold higher on-rate than IgG 15031 or 15032,  
124 respectively. Based on the binding kinetics, we focused further efforts on Ab 15033.

125 We took advantage of the modular design principles of our synthetic Ab library to improve  
126 the affinity of Ab 15033. The naïve synthetic library was constructed with tailored diversification  
127 of key positions in all three heavy chain complementarity-determining regions (CDRs) and the  
128 third CDR of the light chain (CDR-L3). We reasoned that the already high affinity of Ab 15033  
129 could be further improved by recombining the heavy chain with a library of light chains with naïve  
130 diversity in CDR-L3. Following selection for binding to the RBD, the light chain library yielded  
131 numerous variants, of which 17 were purified in the IgG format and analyzed by BLI. Several of  
132 the variant light chains resulted in IgGs with improved binding kinetics compared with IgG 15033,  
133 and in particular, IgG 15033-7 (**Fig. 1B**) exhibited significantly improved avidity ( $K_D$  apparent =

134 300 pM for 15033 or 39 pM for 15033-7) due to an off-rate that was an order of magnitude slower  
135 (**Table 1**).

136

### 137 **Structural analysis of Fabs in complex with the RBD and the S-protein**

138 To rationalize the molecular basis for the differences between nAbs 15033 and 15033-7,  
139 and their ability to block ACE2 binding, we first solved the X-ray crystal structures of Fabs in  
140 complex with the SARS-CoV-2 RBD at 3.2 and 3.0 Å resolution, respectively (**Fig. 2A, Table S1**).  
141 As expected, backbone superposition showed that the two complexes were essentially identical  
142 (RMSD = 0.17 Å). The binding of Fab 15033-7 to the RBD resulted in an interface with 1130 and  
143 1112 Å<sup>2</sup> of buried surface area on the RBD and Fab, respectively. Of the surface area buried on  
144 the Fab, 59% comes from the light chain and 41% from the heavy chain, with the Fab paratope  
145 centered on the receptor binding motif of the RBD (**Fig. 2B**). Comparison of the Fab and ACE2  
146 footprints on the RBD revealed that they overlap extensively, with 69% of the ACE2 footprint  
147 covered by that of the Fab footprint (**Fig. 2C**). It follows that direct steric hindrance explains the  
148 ability of 15033 and 15033-7 to block the RBD-ACE2 interaction (**Fig. 1D**).

149 Fabs 15033 and 15033-7 recognize a patch of surface-exposed non-polar residues on the  
150 RBD using several non-polar residues in both their heavy and light chain CDRs (**Fig. 2D**). The  
151 significance of this interaction mode is made clear by a comparison with the ACE2-RBD complex  
152 (**Fig. 2E**). The same patch of non-polar RBD residues mediates the interaction with ACE2, a  
153 reflection of their importance in both the Fab-RBD and ACE2-RBD complexes. The RBD of SARS-  
154 CoV-2 binds to ACE2 with high affinity and exploiting this surface on the RBD may explain why  
155 Ab 15033 emerged as the most potent Ab in our initial phage-display screen. RBD residue Phe<sup>486</sup>  
156 is particularly noteworthy as its side chain is completely buried in a pocket between CDRs H2, H3  
157 and L3.

158 Abs 15033 and 15033-7 differ at only two positions (15033, Tyr<sup>108L</sup>/Arg<sup>109L</sup>; 15033-7,  
159 His<sup>108L</sup>/Thr<sup>109L</sup>). In the RBD-15033 complex, Tyr<sup>108L</sup> makes van der Waals interactions with  
160 RBD residues Tyr<sup>473</sup> and Ala<sup>475</sup>, as well as a weak hydrogen bond to the side chain of Tyr<sup>473</sup> (**Fig.**  
161 **2F**). In the higher affinity RBD-15033-7 complex, the side chain of the equivalent residue, His<sup>108L</sup>,  
162 makes similar interactions. However, its side chain also makes an additional intramolecular  
163 hydrogen bond to the corresponding residue, Thr<sup>109L</sup>, the other residue that differs between 15033  
164 and 15033-7. Taken together, these residue changes likely stabilize the 15033-7 CDR-L3 loop  
165 conformation with a concomitant improvement in both the van der Waals and hydrogen bond  
166 interactions with RBD residues Tyr<sup>473</sup> and Ala<sup>475</sup>.

167 Using electron cryo-microscopy (cryo-EM), we also determined the structure of Fab  
168 15033-7 in complex with the S-protein trimer. This analysis resulted in the identification of at least  
169 4 different complexes with either two or three Fabs bound to each S-protein trimer (**Fig. 2G-J, S1,**  
170 **S2**). For all but one of the Fabs in these complexes, interpretable density for the entire Fab was  
171 observed, a result of Fab-Fab interactions that served to immobilize the Fab and the RBD to which  
172 it was bound.

173 In two of the complexes with three Fabs bound (**Fig. 2G-H**), all three RBDs were found in  
174 the "up" conformation. The Fabs were relatively well-ordered in both complexes, as adjacent Fabs  
175 contacted each other around the three-fold rotation axis describing the S-protein trimer. Although  
176 three-fold symmetry was observed in one of the complexes (**Fig. 2G, S1A**), in the other, one of  
177 the Fab-RBD units made unique Fab-Fab interactions that broke the symmetry (**Fig. 2H, S1B**).

178 In the third complex with three Fabs bound, two of the RBDs were in the "up" conformation  
179 and the third RBD was in the "down" conformation (**Fig. 2I, S1C**). To accommodate the latter, one  
180 of the other Fab-RBD units was pushed away from the 3-fold rotation axis where it was unable to  
181 make Fab-Fab contacts. As such, the density for the Fab was relatively weak, an indication of  
182 motion/disorder. The remaining Fab-RBD unit stacked over the one in the "down" conformation,  
183 making extensive and yet again different Fab-Fab contacts. This led to a well-packed  
184 arrangement where the Fab bound to the "down" RBD was sandwiched between the two "up"  
185 RBDs.

186 In the complex with 2 Fabs bound (**Fig. 2J, S1D**), the bound RBDs were in the "up"  
187 conformation and the Fab-Fab interactions were very similar to those found in the symmetrical  
188 complex with three Fabs bound (**Fig. 2G, S1A**). The structure showed that the unbound RBD,  
189 which was in the "down" conformation, could not sterically accommodate a Fab and further  
190 affirmed that one of the two "up" Fab-RBD units must move away from the 3-fold rotation axis if  
191 binding to it was to occur.

192 Analysis of the distances between the C-termini of the heavy chains of the Fabs in these  
193 complexes showed that they range from 45 to 120 Å (**Fig. 2G-J**, lower row). In some cases, they  
194 are oriented such that two of them, with some repositioning of the Fab-RBD unit, could be linked  
195 to a single IgG molecule. Indeed, as described below, negative stain electron microscopy  
196 confirmed simultaneous binding of both Fab arms of a single IgG 15033-7 molecule to the S-  
197 protein trimer.

198 Taken together, our structural analysis showed that Fab 15033/15033-7 blocks ACE2  
199 binding to the RBD by direct steric hindrance and that the simultaneous binding of both IgG arms  
200 to the S-protein trimer likely enhances potency through avidity effects. It also showed that Fab

201 15033/15033-7 can make four conformationally distinct complexes with the S-protein trimer  
202 through interactions involving the RBD in either the "up" or "down" conformation, a property also  
203 shared by some other ACE2-blocking Fabs (Barnes et al., 2020). While it was not immediately  
204 apparent why these Fabs were able to recognize both "up" and "down" positions, such flexibility  
205 bodes well for efforts aimed at the design of improved antibody-based therapeutics. Finally, it  
206 showed that different Fab-Fab interaction modes served to define and stabilize the complexes  
207 observed.

208

### 209 **Engineering of tetravalent nAbs with enhanced avidities**

210 Building on these observations, we explored whether we could further enhance the  
211 interactions of these nAbs with the S-protein trimer by taking advantage of modular design  
212 strategies. We generated tetravalent versions of 15033 and 15033-7 by fusing additional copies  
213 of the Fab to either the N- or C- terminus of the IgG heavy chain to construct molecules that we  
214 termed Fab-IgG or IgG-Fab, respectively (**Fig. 3A**).

215 Our ultimate goal is to produce nAbs that can be used to counter SARS-CoV-2 infections  
216 either as a therapeutic and/or as a prophylactic. Aside from high affinity and specificity, effective  
217 nAb drugs must also possess favorable properties including high yields from recombinant  
218 expression in mammalian cells, high thermodynamic stability, and the lack of aggregation and  
219 excessive hydrophobic surface area. To examine these properties, we produced IgGs 15033 and  
220 15033-7, and their Fab-IgG and IgG-Fab counterparts, by transient expression in Expi293F cells.  
221 All six proteins were expressed in high yield (160-200 mg/L) and showed high thermostability with  
222 CH3/Fab melting temperatures ranging from 81-87 °C, values which exceeded that of the  
223 trastuzumab Fab (79.5 °C, **Table 1, Fig. S3**). Size exclusion chromatography revealed that each  
224 IgG eluted as a predominant (91 to >95%) monodispersed peak with elution volumes nearly  
225 identical to that of trastuzumab (**Fig. 3B and Table 1**). All the tetravalent molecules eluted as  
226 single peaks in advance of trastuzumab, an observation consistent with their larger molecular  
227 weights. We also showed that the IgG and tetravalent versions of both 15033 and 15033-7 could  
228 be purified to near homogeneity by protein-A affinity chromatography as evidenced by SDS-PAGE  
229 (**Fig. 3C**). Taken together, these analyses demonstrated that the IgGs and their tetravalent  
230 derivatives possess excellent biophysical properties that will facilitate drug development and  
231 production at large scale.

232 Importantly, the tetravalent Abs exhibited greatly reduced off-rates compared with their  
233 bivalent IgG counterparts, with apparent dissociation constants for the S-protein trimer in the low  
234 single-digit picomolar range as measured by BLI (**Fig. 3D, Table 1**). Negative stain electron



235 microscopy of IgG 15033-7, in complex with the S-protein trimer, showed that the two arms of a  
236 single IgG bound the S-protein trimer in a pincer-like fashion (**Fig. 4B,D**). Fab-IgG 15033-7 also  
237 makes pincer-like interactions with a single S-protein trimer (**Fig. 4C,E, Fig. S6, S7**), but the  
238 complexes revealed additional density that differed from those observed for the complex of the  
239 S-protein trimer with the IgG. In particular, we observed density consistent with that from an  
240 additional Fab in the Fab-IgG complexes, suggesting that all three of the S-protein RBDs are  
241 bound by Fabs from a single tetravalent nAb molecule, Fab-IgG in this instance. Given the range  
242 of complexes observed in our cryo-EM analysis, it is possible that the Fab-IgG, with four available  
243 Fabs, can engage all three RBDs within a single S-protein molecule (**Fig. 4E**). Further analysis  
244 will be required to fully establish whether this occurs, which could explain the decreased off-rates  
245 shown by the tetravalent proteins due to avidity. Nevertheless, it is clear that both the Fab-IgG  
246 and IgG-Fab possess an increased potential for multivalent interactions with one or more S-  
247 protein trimers. The latter mode of interaction may be possible on the viral surface and likely  
248 contributes to enhanced potency observed for the tetravalent IgGs, as shown below using a cell-  
249 based infectivity assay.

250

### 251 **Inhibition of SARS-CoV-2 infection in cell-based assays**

252 We assessed the effects of the nAbs on virus infection in an assay that measured the  
253 infection of ACE2-expressing Vero E6 cells with the SARS-CoV-2 strain 2019 n-  
254 CoV/USA\_WA1/2020. All three high affinity nAbs (15031, 15032 and 15033) from the naïve library  
255 (**Fig. 1**) exhibited dose-dependent neutralization of SARS-CoV-2 infection, confirming their  
256 inhibitory capacity (**Fig. S4**). Consistent with their affinities, IgG 15033 was the most potent with  
257 an IC<sub>50</sub> of 3.3 nM, and its potency was confirmed with the observation of strong neutralization of  
258 a second SARS-CoV-2 strain (2019-nCoV/Italy-INMI1). Neutralization of the second strain was  
259 consistent with that of the first strain, and for simplicity, only one set of data are shown.

260 The tetravalent Fab-IgG and IgG-Fab versions of 15033 exhibited improved potencies  
261 with IC<sub>50</sub> values of 170 and 160 pM, respectively (**Fig. 5A and Table 1**). The optimized IgG 15033-  
262 7 also exhibited high neutralizing potency with an IC<sub>50</sub> of 550 pM and its tetravalent Fab-IgG and  
263 IgG-Fab versions exhibited the best potencies of all the molecules tested with IC<sub>50</sub> values of 60  
264 and 37 pM, respectively. Taken together, these results support the ability of naïve synthetic Ab  
265 libraries to yield highly potent nAbs with drug-like properties. Moreover, further optimization  
266 through the engineering of tetravalent formats can produce drug-like molecules with ultra-high  
267 potencies that exceed those of bivalent IgGs.

268

269 **Resistance to potential viral escape mutants**

270 To explore the sensitivity of our nAbs to potential escape mutants, we generated HIV-gag-  
271 based lentivirus-like particles (VLPs) pseudotyped with the SARS-CoV-2 S-protein. We confirmed  
272 ACE2-dependent infection of HEK-293 cells stably over-expressing exogenous ACE2 by  
273 pseudotyped VLPs, and we showed that infection was inhibited by either Fc-tagged RBD (RBD-  
274 Fc) or IgG 15033 (data not shown). Using this system, we generated a panel of 44 pseudotyped  
275 VLP variants (**Fig. S5A**), each containing a single alanine substitution at an RBD position within  
276 or close to the ACE2-binding site. Twenty of these VLP variants exhibited a >4-fold reduction in  
277 infection compared with the wild-type (wt) VLP, suggesting that the substituted residues  
278 contributed favorably to the interaction between the RBD and ACE2. The remaining 29 VLP  
279 variants infected with high efficiency, suggesting that these are positions where residue changes  
280 could abrogate antibody binding without affecting the ACE2 interaction.

281 Using the panel of 29 infective VLP variants, we measured VLP infection after treatment  
282 with the various nAbs (**Fig. 5B**). We defined as escape mutants those VLP variants for which  
283 entry in the presence of 50 nM nAb was >5% of the entry in the absence of the nAb. Based on  
284 this definition, we found that 7 of the variants were able to escape from IgG 15033 (**Fig. S5A**),  
285 whereas only 4 could escape from IgG 15033-7. We also found that 15033 in tetravalent Ab  
286 format neutralized more variants than it did as an IgG, and that, remarkably, tetravalent Ab 15033-  
287 7 strongly neutralized all of the variants but one (Phe<sup>486</sup>). As discussed above, RBD residue  
288 Phe<sup>486</sup> is found in the non-polar interface between the RBD and the Fab and it makes numerous  
289 contacts with CDRs H2, H3 and L3, sitting deep in a pocket formed by these contacts (**Fig.**  
290 **S5B,C**). As such, it represents a bona fide positional vulnerability where mutant viruses still  
291 capable of binding ACE2 could evade neutralization by nAb 15033-7. Comprehensive maps of  
292 escape mutations confirm the vulnerability of other nAbs to this mutation, but also suggest  
293 strategies by which escape can be overcome with nAb cocktails or bi-specific nAbs (Greaney et  
294 al., 2020). Overall, these results showed that for IgGs, increasing the affinity of the Fab-RBD  
295 interaction increased neutralizing potency and resistance to mutation, and moreover, that  
296 tetravalent presentation of the Fab provides even greater potency and increased resistance to  
297 potential escape mutants.

298

299

300

301 **DISCUSSION**

302 SARS-CoV-2 has wreaked havoc on global health and the economy and highlighted the  
303 need for drug development technologies to combat not only COVID-19, but emerging infectious  
304 diseases in general. In this context, we have used synthetic antibody engineering to rapidly  
305 develop unique formats of human nAbs as therapeutic candidates. Our nAb formats include  
306 natural bivalent IgGs as well as ultra-potent tetravalent molecules arising from a modular design  
307 strategy that adds two additional Fabs to the canonical IgG molecule. Most importantly, we have  
308 shown that the enhanced avidities and potencies characteristic of the tetravalent nAbs are  
309 achieved without compromising the favorable properties – such as yield, solubility, and stability -  
310 that make IgG molecules ideal drugs. Moreover, we showed that the tetravalent nAbs are more  
311 resistant to potential escape mutations, an observation highlighting the utility of these molecules  
312 as therapeutics against SARS-CoV-2 and other viruses capable of rapidly mutating under  
313 selection pressure.

314 Structural analyses showed that IgG and Fab-IgG 15033-7 make pincer-like interactions  
315 with a single SARS-CoV-2 S-protein trimer, an observation providing insight into the basis for the  
316 avidity observed for these molecules. It also provides strong evidence that the tetravalent Fab-  
317 IgG can engage all three RBDs of the S-protein trimer, and that the RBD can be bound by a Fab  
318 in either the "up" or "down" conformation. We did not optimize the tetravalent formats; their very  
319 high avidities arose naturally from the geometry of the Fab-RBD complex, the spatial relationships  
320 between the Fabs, the flexibility of the RBDs on the S-protein trimer, and fortuitous Fab-Fab  
321 interactions that clearly stabilized the complexes observed. We and others have generated many  
322 additional Fabs that can inhibit the virus but employ different epitopes to do so, and incorporating  
323 these Fabs into tetravalent frameworks, including bispecific formats targeting two distinct  
324 epitopes, has the potential to generate a vast array of ultra-high affinity nAbs with minimal further  
325 effort. Taken together, these observations underscore the vast potential of our modular design  
326 approach for the development of novel and highly effective nAb therapeutics, and our approach  
327 has the potential to further optimize any COVID-19 nAb therapeutic currently in development.

328 COVID-19 has also exposed the need for drug development to respond to emerging viral  
329 threats in real time. In this regard, the isolation of nAbs from the B cells of infected individuals has  
330 emerged as a rapid approach to obtaining leads for novel drug development. Indeed, several  
331 reports have shown that these technologies can deliver drug-grade therapeutic nAbs for  
332 manufacturing and subsequent clinical trials in approximately six months (Hansen et al., 2020;  
333 Jones et al.). Further highlighting the urgent need and the rapid speed at which drug development  
334 has proceeded, these IgG-based nAbs have now received emergency-use approval from the US

335 FDA as both cocktail and single agent, and these extraordinarily rapid drug development timelines  
336 set a benchmark for alternative technologies. The potencies of other anti-SARS CoV-2 nAbs  
337 obtained in similar fashion range from nanomolar (Wu et al., 2020) to picomolar (Liu et al., 2020),  
338 but those that have been awarded approval for emergency use have potencies in the middle of  
339 this range (Hansen et al., 2020; Jones et al.). Thus, it is worth noting that antibodies with higher  
340 *in vitro* potencies may further improve *in vivo* efficacy, and our tetravalent formats should be  
341 applicable to enhance potency of nAbs in general.

342 With our platform, we show that synthetic *in vitro* antibody engineering is comparable to B  
343 cell cloning, in terms of both speed and potency of drug development (Hansen et al., 2020; Zost  
344 et al., 2020). Our project was initiated at the beginning of April 2020 when we identified our first  
345 naïve Ab leads. Within a month, we validated lead IgG molecules as neutralizing agents in cell-  
346 based assays with authentic virus. In parallel, we initiated further selections to optimize the Fab  
347 15033 paratope, that yielded our best lead nAb 15033-7; both Fabs were then reformatted as  
348 tetravalent molecules (Fab-IgG and IgG-Fab) to further enhance potency. Though others have  
349 now shown enhanced potency of SARS-CoV-2 neutralization with oligomers of Ab variable  
350 domains (Schoof et al., 2020) and synthetic proteins (Cao et al., 2020a), insofar as our format  
351 closely resembles natural Abs, they can also be manufactured at large scale, possess long half-  
352 lives and likely low immunogenicity, all of which are required to become effective drugs. Indeed,  
353 by the beginning of October, we established manufacturing-grade stable cells capable of  
354 producing multi-gram quantities of drug-grade nAbs from a litre of culture, in both the IgG and  
355 tetravalent formats. We are now manufacturing our best nAb for clinical trials. Thus, synthetic Ab  
356 engineering technologies can match the six-month lead-to-manufacture timelines established by  
357 methods based on the cloning of natural nAbs.

358 Our synthetic engineering technologies offer exquisite control over Ab design and by  
359 introducing tailored diversity into an optimized IgG framework, ensures that candidate  
360 therapeutics possess biophysical properties that are ideal for drug development. Facilitated by  
361 the use of highly stable frameworks, we now demonstrate the rapid construction of complex  
362 tetravalent formats that enhance potency while retaining favorable drug-like properties. Perhaps  
363 most importantly though, synthetic methods do not rely on infected patients (i.e. natural  
364 repertoires) as a source of drug leads. By its very nature, B cell cloning is a reactive technology  
365 that can be implemented only after a viral outbreak is underway, and this places a limit on the  
366 time required for drug development. With synthetic *in vitro* methods, drug development can  
367 proceed in a proactive manner, as the development and stockpiling of potential therapeutics in  
368 advance of outbreaks is feasible. Indeed, large-scale surveillance and sequencing efforts have

369 provided unprecedented access to the genomes of numerous SARS-CoV-2-related viruses and  
370 other pathogens with the potential to cross species barriers and infect humans (Daszak et al.,  
371 2020; Shi and Hu, 2008). With our approach, it is feasible to develop - in advance, synthetic Abs  
372 against hundreds of antigens in parallel (Hornsby et al., 2015) and working within a collaborative  
373 international network, we have initiated efforts with this aim.

374

## 375 **ACKNOWLEDGEMENTS**

376 This study was supported in part by contracts and grants from NIH (R01 AI157155) and  
377 the Defense Advanced Research Project Agency (HR001117S0019) to MSD, NIH grants  
378 P01AI120943 and R01AI123926 to GKA, and an NIH grant R01AI107056 to DWL. This study was  
379 also supported in part by a CIHR operating grant (COVID-19 Rapid Research Funding #OV3-  
380 170649) to JR and SSS, and by the Lazio Region (Italy, DGR n. 653 29 September 2020) and  
381 the Rome Foundation (Italy, Prot 317A/I). Additional support was generously provided by FAST  
382 grants #2161 to GKA and SSS and #2189 to SSS, from Emergent Ventures through the  
383 Thistledown Foundation (Canada) and the Mercatus Center at George Mason University. We are  
384 grateful to Daniele Lapa (INMI), for his contribution in determining the neutralizing power of the  
385 antibodies tested in Rome. We are also grateful to Carlo Tomino for his valuable help in preparing  
386 for the regulatory aspects of monoclonal antibodies in Italy.

387

## 388 **AUTHOR CONTRIBUTIONS**

389 †**Shane Miersch** Conceptualization, Methodology, Investigation, Supervision, Writing - Original  
390 Draft, Writing - Review & Editing, Visualization, Validation, Project administration

391 †**Zhijie Li** Methodology, Investigation, Data Curation, Visualization, Formal analysis, Validation,  
392 Writing - Original Draft, Writing - Review & Editing

393 **Reza Saberianfar** Methodology, Investigation

394 **Mart Ustav** Conceptualization, Methodology, Investigation

395 **Brett Case** Investigation, Validation

396 **Levi Blazer** Conceptualization, Investigation

397 **Chao Chen** Investigation

398 **Wei Ye** Investigation

399 **Alevtina Pavlenco** Investigation

400 **Maryna Gorelik** Investigation

401 **Julia Garcia Perez** Investigation

402 **Suryaseree Subramania** Investigation

403 **Serena Singh** Investigation  
404 **Lynda Ploder** Investigation  
405 **Safder Ganaie** Investigation  
406 **Daisy Leung** Investigation  
407 **Rita E. Chen** Investigation  
408 **Pier Paolo Pandolfi** Investigation  
409 **Giuseppe Novelli** Investigation  
410 **Giulia Matusali** Investigation  
411 **Francesca Colavita** Investigation  
412 **Maria R. Capobianchi** Investigation  
413 **Suresh Jain** Funding acquisition  
414 **J.B. Gupta** Funding acquisition  
415 **Gaya Amarasinghe** Supervision, Writing - Review & Editing  
416 **Michael Diamond** Supervision, Writing - Review & Editing  
417 \***James Rini** Conceptualization, Writing - Review & Editing, Supervision, Funding acquisition  
418 \***§Sachdev Sidhu** Conceptualization, Writing - Original Draft, Supervision, Funding acquisition

419

420

421

## 422 **DECLARATION OF INTERESTS**

423 MSD is a consultant for Inbios, Vir Biotechnology, NGM Biopharmaceuticals, Carnival  
424 Corporation and on the Scientific Advisory Boards of Moderna and Immunome. The Diamond  
425 laboratory has received unrelated funding support in sponsored research agreements from  
426 Moderna, Vir Biotechnology, and Emergent BioSolutions. SSS, SJ, SM, MU, JBG and PPP are  
427 shareholders in Virna Therapeutics.

428

429

430

431 **FIGURE LEGENDS**

432

433 **Figure 1. Characterization of anti-RBD Abs by ELISA. (A)** Binding of unique Fab-phage clones  
434 to immobilized RBD blocked by solution-phase ACE2. Signal was normalized to the signal in the  
435 absence of ACE2. **(B)** CDR sequences of Abs for which the binding to RBD was strongly blocked  
436 by ACE2. Positions are numbered according to the IMGT nomenclature (Lefranc et al., 2003).  
437 Sequences in 15033-7 that differ from 15033 are shaded *black*. **(C)** Serial dilutions of IgG binding  
438 to immobilized S-protein trimer. The EC<sub>50</sub> values derived from the curves are shown in **Table 1**  
439 and values are representative of 2 independent experiments. **(D)** Binding of biotinylated ACE2 to  
440 immobilized S-protein blocked by solution-phase IgG. Signal was normalized to the signal in the  
441 presence of a non-binding control IgG and error bars show the standard error of the mean of  
442 duplicate samples. **(E)** Assessment of non-specific binding of IgGs to immobilized antigens or a  
443 goat anti-human Fc Ab (positive control).

444

445 **Figure 2. Structural analysis of Fabs bound to the RBD. (A-F)** X-ray crystallography analysis.  
446 **(A)** Ribbon diagram of Fab 15033-7 in complex with the RBD. The RBD is shown in white. The  
447 light and heavy chains of the Fab are shown in pink or blue, respectively. **(B)** Fab 15033-7 (surface  
448 representation) and its interaction with the receptor binding motif (green ribbons) of the RBD. The  
449 paratope defined by the Fab-RBD complex is colored blue (heavy chain) and pink (light chain).  
450 **(C)** Surface representation of the RBD colored to show the Fab footprint (blue + green), the ACE2  
451 footprint (yellow + green) and their significant overlap (green). **(D)** Non-polar residues (magenta)  
452 on the Fab (15033 shown; light chain, pink; heavy chain, blue) make key interactions with a stretch  
453 of exposed apolar residues (green) on the RBD (white). **(E)** These same non-polar residues are  
454 critical for ACE2 binding. Highlighted is the important interaction with RBD residue Phe<sup>486</sup> in the  
455 ACE2 complex. **(F)** Fabs 15033 (light pink) and 15033-7 (dark pink) differ by only two residues  
456 in CDR-L3. In 15033-7, His<sup>108</sup> forms an additional hydrogen bond with Thr<sup>109</sup>, stabilizing the local  
457 conformation of the CDR-L3 loop. **(G-J)** Cryo-EM analysis. Four Fab-S-protein complexes were  
458 observed in the cryo-EM maps: **(G)** the 3-Fab-bound, 3-"up", C3 symmetric structure; **(H)** the 3-  
459 Fab-bound, 3-"up", asymmetric structure; **(I)** the 3-Fab-bound, 2-"up"-1-"down" structure; **(J)** the  
460 2-Fab-bound, 2-"up" structure. Upper row: side view of the EM maps; lower row: top view of the  
461 EM maps with the Fabs in ribbons. The dotted lines indicate distances between the C-terminal  
462 ends of the Fab heavy chains. Light blue, unit A Fab; orange, unit B Fab; magenta, unit C Fab;  
463 green/blue, RBD. In **(I)** and **(J)** the blue RBDs are in the "down" position. In **(H)** the blue RBD and  
464 its bound Fab (unit C) is rotated, breaking the C3-symmetry. In **(I)** the density for the B unit Fab

465 is weak. The distances involving it were derived from the best fit of a Fab (orange) to the density  
466 (also see **Fig S1, S2**).

467  
468 **Figure 3. Design and characterization of tetravalent nAbs.** (A) Schematic of the bivalent IgG  
469 format, and the tetravalent Fab-IgG and IgG-Fab formats. Paratopes are shown in red, linkers are  
470 shown in black, and disulfide bonds are shown as yellow spheres. (B) Analytical gel filtration SEC  
471 of nAbs. (C) SDS-PAGE analysis of nAbs under non-reducing (top) or reducing conditions  
472 (bottom). (D) BLI sensor traces for nAbs (6.7 nM) binding to immobilized S-protein trimer.

473  
474 **Figure 4. Negative stain electron microscopy analysis of nAbs and their interaction with**  
475 **the S-protein trimer.** (A) Examples of the 15033-7 IgG (left), Fab-IgG (middle) and IgG-Fab  
476 (right) molecules observed in the negative stain micrographs. Schematic interpretations are  
477 shown to the right of each image. (B) Negative stain electron microscopy 2D class averages of  
478 IgG 15033-7 in complex with the S-protein trimer. (C) Negative stain electron microscopy 2D  
479 class averages of Fab-IgG 15033-7 in complex with the S-protein trimer. The arrows indicate  
480 Fab-sized densities not observed in the IgG complex in (B). (D) Tentative schematic of the  
481 complex in (B) showing a trimer with 2 RBDs "up" and one RBD "down". (E) Schematics of the  
482 four possible ways that the Fab-IgG can bind to the two "up" RBDs of a trimer that has two RBDs  
483 "up" and one RBD "down". In (D) and (E), the following color scheme was used: white, Fc;  
484 orange, the Fabs of a native IgG; blue, the Fabs added to the native IgG. Wavy lines indicate the  
485 locations of the CDRs. The Fabs with heavy outline are making specific interactions through their  
486 CDRs. As shown by our Cryo-EM structures, the RBD in the "down" conformation is accessible  
487 for specific interaction with one of the remaining Fabs (orange or blue with light dotted outline)  
488 shown in (E). This would lead to a trivalent interaction with the S-protein trimer and may explain  
489 the additional Fab-sized densities observed in (C).

490  
491 **Figure 5. Neutralization of SARS-CoV-2 and pseudotyped VLPs.** (A) Neutralization of SARS-  
492 CoV-2 strain 2019 n-CoV/USA\_WA1/2020 by bivalent and tetravalent nAbs (also see **Fig. S4**).  
493 The virus was pre-treated with serial dilutions of nAb and infection of ACE2-expressing Vero E6  
494 cells was measured relative to untreated control. Samples were run in triplicate and results are  
495 representative of two independent experiments. Error bars indicate standard error of the mean.  
496 (B) Neutralization of a panel of pseudotyped VLPs displaying SARS-CoV-2 S-proteins with single  
497 alanine mutations in or near the ACE2-binding site of the S-protein RBD (also see **Fig. S5**). The  
498 VLPs were treated with 50 nM of the indicated nAb and uptake by ACE2-expressing HEK-293



499 cells was measured in duplicate, and results are representative of two independent experiments.  
 500 The heat map shows uptake normalized to uptake in the absence of nAb. Boxed cells indicate  
 501 VLPs that represent potential escape mutants for a given nAb, as defined by >5% uptake with  
 502 nAb treatment compared with untreated control (the percent uptake is shown in each cell).

503

## 504 TABLES

505 **Table 1. Affinity, potency and biophysical characteristics of nAbs**

| Ab          | Format  | BLI analysis <sup>a</sup>                                             |                                                         |                                 | Virus inhibition <sup>b</sup> |                             | SEC analysis <sup>c</sup> |                        | T <sub>M</sub> 2 <sup>d</sup><br>(°C) | Yield <sup>e</sup><br>(mg/L) |
|-------------|---------|-----------------------------------------------------------------------|---------------------------------------------------------|---------------------------------|-------------------------------|-----------------------------|---------------------------|------------------------|---------------------------------------|------------------------------|
|             |         | K <sub>on</sub><br>(10 <sup>5</sup> M <sup>-1</sup> s <sup>-1</sup> ) | k <sub>off</sub><br>(10 <sup>-5</sup> s <sup>-1</sup> ) | Apparent K <sub>D</sub><br>(pM) | IC <sub>50</sub><br>(pM)      | IC <sub>50</sub><br>(ng/mL) | Monomer Peak<br>(%)       | Elution volume<br>(mL) |                                       |                              |
| trastuzumab | IgG     | NA                                                                    | NA                                                      | NA                              | NA                            | NA                          | >95                       | 9.2                    | 79.5                                  | 303                          |
| 15033       | IgG     | 17                                                                    | 50                                                      | 300                             | 3260                          | 489                         | 91                        | 9.3                    | 81                                    | 207                          |
| 15033-7     | IgG     | 18                                                                    | 7                                                       | 39                              | 550                           | 83                          | 95                        | 9.1                    | 81                                    | 165                          |
| 15033       | Fab-IgG | 46                                                                    | 1.5                                                     | 3                               | 170                           | 43                          | >95                       | 8.2                    | 87                                    | 214                          |
| 15033-7     | Fab-IgG | 40                                                                    | 0.8                                                     | 2                               | 60                            | 15                          | 93                        | 8                      | 85.5                                  | 194                          |
| 15033       | IgG-Fab | 36                                                                    | 1.9                                                     | 5                               | 160                           | 41                          | >95                       | 8.2                    | 87                                    | 166                          |
| 15033-7     | IgG-Fab | 30                                                                    | <0.1                                                    | <1                              | 37                            | 9.3                         | 93                        | 8.1                    | 85                                    | 118                          |

<sup>a</sup>Calculated by assay of serial dilutions of nAb binding to immobilized S-trimer, as shown in Fig. 3D

<sup>b</sup>Calculated from assays shown in Fig. 5A

<sup>c</sup>Calculated from analysis shown in Fig. 3B

<sup>d</sup>Calculated from analysis shown in Fig. S3

<sup>e</sup>Calculated from proteins produced by transient transfection of Expi293F cells followed by affinity purification with Protein A sepharose, as shown in Fig. 3C.

506  
507  
508  
509  
510  
511

512

## 513 STAR METHODS

514

### 515 Cells

516 Mammalian cells were maintained in humidified environments at 37 °C in 5% CO<sub>2</sub> in the indicated  
 517 media. Vero E6 (ATCC), HEK293T (ATCC) and HEK293T cells stably overexpressing ACE2 were  
 518 maintained at 37 °C in 5% CO<sub>2</sub> in DMEM containing 10% (vol/vol) FBS. Expi293F cells  
 519 (ThermoFisher) were maintained at 37 °C in 8% CO<sub>2</sub> in Expi293F expression media  
 520 (ThermoFisher).

521

### 522 Protein production

523 The previously reported piggyBac transposase-based expression plasmid PB-T-PAF (Li et al.,  
 524 2013) containing a CMV promoter (PB-CMV) and a woodchuck hepatitis virus posttranscriptional  
 525 regulatory element (WPRE) was used for large-scale transient expression. cDNA encoding the  
 526 SARS-CoV-2 S-protein ectodomain trimer (residues 1-1211), followed by a foldon trimerization  
 527 motif (Tao et al., 1997), a 6xHis tag and an AviTag biotinylation motif (Fairhead and Howarth,  
 528 2015) was cloned in to the PB-CMV vector using standard molecular biology techniques, and  
 529 residues 682–685 (RRAR) and 986–987 (KV) were mutated to SSAS or PP sequences,  
 530 respectively, to remove the furin cleavage site on the SARS-CoV-2 spike protein or to stabilize

531 the pre-fusion form of the spike (Pallesen et al., 2017), respectively. The SARS-CoV-2 receptor  
532 binding domain (RBD, residues 328-528), the soluble human ACE2 construct (residues 19-615),  
533 and the SARS-CoV RBD (residues 315-514), each followed by a 6xHis tag and an AviTag, were  
534 similarly cloned into the same vector. For expression, PB-CMV expression constructs were mixed  
535 with Opti-MEM media (Gibco) containing 293fectin reagent (Thermo Fisher) and the mixture was  
536 incubated for 5 min before addition to the shaker flask containing  $10^6$  Freestyle 293-F cells/mL  
537 grown in suspension in Freestyle 293 expression media (Thermo Fisher). Expression was allowed  
538 to continue for 6 days before purification.

539

#### 540 **Protein purification and *in vitro* biotinylation**

541 Expressed proteins were harvested from expression medium by binding to Ni-NTA affinity resin  
542 followed by elution with 1X PBS containing 300 mM imidazole and 0.1% (v/v) protease inhibitor  
543 cocktail (Sigma), then further purified by size-exclusion chromatography. For the RBDs and  
544 ACE2, a Superdex 200 Increase (GE healthcare) column was used. For the S-protein  
545 ectodomain, a Superose 6 Increase (GE healthcare) column was used. Purified proteins were  
546 site-specifically biotinylated in a reaction with 200  $\mu$ M biotin, 500  $\mu$ M ATP, 500  $\mu$ M MgCl<sub>2</sub>, 30  
547  $\mu$ g/mL BirA, 0.1% (v/v) protease inhibitor cocktail and not more than 100  $\mu$ M of the protein-AviTag  
548 substrate. The reactions were incubated at 30 °C for 2 hours and biotinylated proteins were then  
549 purified by size-exclusion chromatography.

550

#### 551 **Phage display selections**

552 A synthetic, phage-displayed antibody library (Persson et al., 2013) was selected for binding to  
553 SARS-CoV-2 RBD in solution. In each round, phage library was first depleted on neutravidin  
554 immobilized in wells of a 96-well Maxisorp plate from a 2  $\mu$ g/mL solution incubated with shaking  
555 overnight at 4 °C, then incubated with 50 nM biotinylated RBD in solution for two hours at RT.  
556 Protein-phage complexes were captured in wells coated with neutravidin as above for 15 min at  
557 RT. After washing with 1X PBS pH 7.4 containing 0.05% Tween, phage were eluted for 5 min with  
558 0.1 M HCl and then neutralized with 1 M Tris pH 8.0. Eluted phage were amplified, purified, and  
559 selected for binding to target for a total of 5 rounds, after which, individual phage clones were  
560 subjected to DNA sequencing, as described (Persson et al., 2013).

561

#### 562 **Enzyme-linked immunosorbent assays**

563 For ELISAs, plates were coated with neutravidin, as above, then blocked with PBS, 0.2% BSA for  
564 1 h. Biotinylated target protein was captured from solution by incubation in neutravidin-coated and

565 BSA-blocked wells for 15 min with shaking at RT, and subsequently, phage or Ab was added and  
566 allowed to bind for 30 min. Plates were washed, incubated with an appropriate secondary  
567 antibody, and developed with TMB substrate as described (Miersch et al., 2017).

568

### 569 **Construction of genes encoding tetravalent Abs**

570 DNA fragments encoding heavy chain Fab regions (VH-CH1; terminating at hinge residue Thr<sup>10</sup>,  
571 IMGT numbering (Lefranc et al., 2003)) were amplified by PCR from the IgG expression  
572 constructs. Tetravalent Ab constructs were generated by fusing these fragments with their  
573 respective IgG heavy chain in the pSCSTa mammalian expression vector using Gibson assembly  
574 (New England Biolabs, Ipswich, MA). Fab-IgG constructs were arranged by fusing a heavy chain  
575 Fab domain to the N-terminus of the IgG using a S(G4S)<sub>3</sub> linker. IgG-Fab constructs were  
576 arranged by fusing a heavy chain Fab domain to the C-terminus using a G(G4S)<sub>2</sub>GGGTG linker.  
577 For both formats, the Fc region terminated at Gly<sup>129</sup> (IMGT numbering (Lefranc et al., 2003)).

578

### 579 **Ab production and purification**

580 IgG and tetravalent Abs were produced in Expi293F cells (ThermoFisher) by transient  
581 transfection, by diluting heavy and light chain construct DNA in OptiMem serum-free media  
582 (Gibco) before the addition of and incubation with FectoPro (Polyplus Transfection) for 10 min.  
583 For IgG expression, equivalent amounts of plasmids encoding heavy chain or light chain were  
584 transfected, whereas for tetravalent formats, a ratio of 2:1 light chain to heavy chain plasmids was  
585 used. Following addition of the DNA complex to Expi293F cells and a 5-day expression period,  
586 Abs were purified using rProtein A Sepharose (GE Healthcare), then buffer exchanged and  
587 concentrated using Amicon Ultra-15 Centrifugal Filter devices (Millipore). IgGs were stored in  
588 PBS (Gibco), and tetravalent Abs were stored in 10 mM L-Histidine, 0.9% sucrose, 140 mM NaCl,  
589 pH 6.0.

590

### 591 **Size exclusion chromatography**

592 Protein samples (50 µg) were injected onto a TSKgel BioAssist G3SWxl column (Tosoh) fitted  
593 with a guard column using an NGC chromatography system and a C96 autosampler (Biorad). The  
594 column was preequilibrated in a PBS mobile phase and protein retention was monitored by  
595 absorbance at 215 nm during a 1.5 CV isocratic elution in PBS.

596

### 597 **Biolayer interferometry**

598 The binding kinetics and estimation of apparent affinity ( $K_D$ ) of Abs binding to the S-protein were  
599 determined by BLI with an Octet HTX instrument (ForteBio) at 1000 rpm and 25 °C. Biotinylated  
600 S-protein was first captured on streptavidin biosensors from a 2 µg/mL solution to achieve a  
601 binding response of 0.4-0.6 nm and unoccupied sites were quenched with 100 µg/mL biotin. Abs  
602 were diluted with assay buffer (PBS, 1% BSA, 0.05% Tween 20) and 67 nM of an unrelated  
603 biotinylated protein of similar size was used as negative control. Following equilibration with assay  
604 buffer, loaded biosensors were dipped for 600 s into wells containing 3-fold serial dilutions of each  
605 Ab starting at 67 nM, and subsequently, were transferred back into assay buffer for 600 s. Binding  
606 response data were corrected by subtraction of response from a reference and were fitted with a  
607 1:1 binding model using ForteBio's Octet Systems software 9.0.

608

### 609 **Differential scanning fluorimetry**

610 Thermostabilities of Abs were determined by differential scanning fluorimetry using Sypro Orange,  
611 as described (Niedziela-Majka et al., 2015), with a 1 µM solution of Ab and temperature range  
612 from 25-100 °C in 0.5 °C increments.

613

### 614 **Generation of pseudotyped VLPs**

615 HEK-293 cells (ATCC) were seeded in a 6-well plate at  $0.3 \times 10^6$  cells/well in DMEM  
616 (ThermoFisher) supplemented with 10% FBS and 1% penicillin-streptomycin (Gibco) and grown  
617 overnight at 37 °C with 5% CO<sub>2</sub>. HEK-293 cells were then co-transfected with 1 µg of pNL4-  
618 3.luc.R-E- plasmid (luciferase expressing HIV-1 with defective envelop protein) (NIH AIDS  
619 Reagent Program) and 0.06 µg of CMV-promoter driven plasmid encoding wt or mutant S-protein  
620 using Lipofectamine™ 2000 transfection reagent (ThermoFisher). Pseudotyped VLPs were  
621 harvested by collecting supernatant 48 h after transfection and were filter sterilized (0.44 µm,  
622 Millipore Sigma, Cat. No. SLHA033SS).

623

624

### 625 **Infection assays with pseudotyped VLPs**

626 HEK-293 cells stably over-expressing full-length human ACE2 protein were seeded in 96-well  
627 white polystyrene microplates (Corning, Cat. No. CLS3610) at  $0.03 \times 10^6$  cells/well in DMEM (10%  
628 FBS and 1% penicillin-streptomycin) and were grown overnight at 37 °C with 5% CO<sub>2</sub>.  
629 Pseudotyped VLPs were mixed with Ab, incubated at room temperature for 10 min, and added to  
630 the cells. The cells were incubated at 37 °C with 5% CO<sub>2</sub>, the medium was replaced with fresh  
631 DMEM (10% FBS and 1% penicillin-streptomycin) after 6 h, and again every 24 h up to 72 h. To

632 measure the luciferase signal (VLP entry), DMEM was removed and cells were replaced in DPBS  
633 (ThermoFisher) and mixed with an equal volume of ONE-Glo™ EX Luciferase Assay System  
634 (Promega). Relative luciferase units were measured using a BioTek Synergy Neo plate reader  
635 (BioTek Instruments Inc.). The data were analyzed by GraphPad Prism Version 8.4.3 (GraphPad  
636 Software, LLC).

637

### 638 **SARS-CoV-2 focus reduction neutralization assay**

639 SARS-CoV-2 strain 2019 n-CoV/USA\_WA1/2020 was obtained from the Centers for Disease  
640 Control (USA) and Prevention. Virus stocks were produced in Vero CCL81 cells (ATCC) and  
641 titrated by focus-forming assay on Vero E6 cells (Case et al., 2020). Serial dilutions of mAbs were  
642 incubated with  $10^2$  focus-forming units (FFU) of SARS-CoV-2 for 1 h at 37 °C. MAb-virus  
643 complexes were added to Vero E6 cell monolayers in 96-well plates and incubated at 37 °C for 1  
644 h. Cells were overlaid with 1% (w/v) methylcellulose in MEM supplemented with 2% FBS. Plates  
645 were harvested after 30 h by removing overlays and were fixed with 4% PFA in PBS for 20 min  
646 at RT. Plates were washed and sequentially incubated with 1 µg/mL of CR3022 (Yuan et al.,  
647 2020) anti-S-protein antibody and HRP-conjugated goat anti-human IgG in PBS, 0.1% saponin,  
648 0.1% BSA. SARS-CoV-2-infected cell foci were visualized using TrueBlue peroxidase substrate  
649 (KPL) and were quantitated on an ImmunoSpot microanalyzer (Cellular Technologies). Data were  
650 processed using Prism software (GraphPad Prism 8.0).

651

### 652 **X-ray crystallography**

653 The SARS-CoV-2 RBD (residues 328-528) was expressed with a C-terminal 6xHis tag  
654 from HEK293F GnT1-minus cells. The Fabs were expressed from HEK293F cells. The RBD was  
655 purified from the expression media by metal-affinity chromatography using Ni-NTA beads  
656 (Qiagen). The Fab fragments were purified from the expression media using rProtein A  
657 Sepharose Fast Flow beads (GE healthcare). The RBD was treated with endoglycosidase H  
658 (Robbins et al., 1984) and Carboxypeptidase A (Sigma-Aldrich), to remove the N-glycans and the  
659 C-terminal 6xHis tag. The RBD and Fabs were further purified by ion-exchange and hydrophobic  
660 interaction chromatography. Before crystallization, the RBD-Fab complexes were purified using  
661 size-exclusion chromatography on a Superdex 200 Increase column (GE Healthcare). For both  
662 Fab 15033 and Fab 15033-7, the optimized crystallization conditions contained 1.2-1.6 M  
663  $(\text{NH}_4)_2\text{SO}_4$  and 8-18% glycerol. X-ray diffraction data were collected at 100 K on beamline 08IB-  
664 1 at the Canadian Light Source. The diffraction data were integrated and scaled using the XDS  
665 package (Kabsch, 2010). The structures were solved by molecular replacement using the

666 program Phaser (McCoy et al., 2007). A homology model of the VH-VL region was produced by  
667 the SysImm Repertoire Builder server ([https://sysimm.org/rep\\_builder](https://sysimm.org/rep_builder))(Schritt et al., 2019). The  
668 CDR loops were then deleted from this VH-VL model. The constant (CH1-CL) region search  
669 model and the RBD search model were both derived from PDB entry 6W41 (Yuan et al., 2020).  
670 The three models were used to solve the structure by molecular replacement. The atomic models  
671 were built using Coot (Emsley et al., 2010) and refined with Phenix.refine (Afonine et al., 2012).

672

### 673 **Negative stain electron microscopy**

674 3  $\mu$ L of the S-protein ectodomain were applied to the surface of a glow-discharged (60 s,  
675 15 mA), carbon-coated copper mesh grid. The grid was washed with water and stained with 3  $\mu$ L  
676 of 2% uranyl formate. Micrographs were acquired on a Talos L120C 120 kV electron microscope  
677 equipped with a Ceta 16M CMOS camera. Particle selection and two-dimensional classification  
678 were carried out using cryoSPARC v2. Contrast transfer function (CTF) estimation was  
679 performed using GCTF (Zhang, 2016).

680

681

### 682 **Cryo-EM**

683 Four additional substitutions for proline residues (817P/A892P/A899P/A942P) were  
684 introduced to the S-2P SARS-CoV-2 S-protein ectodomain to stabilize the prefusion conformation  
685 (Hsieh et al., 2020). Fab 15033-7 was mixed with the SARS-CoV-2 spike ectodomain at a 3:1  
686 molar ratio. 3  $\mu$ L of the Fab-spike mixture containing 0.4 mg/mL total protein were applied to a  
687 glow-discharged (60 s, 15 mA) C-flat 2/2 carbon holey grid (CF-2/2-4C, Electron Microscopy  
688 Science). Plunge vitrification was performed using a Thermo Fisher Scientific Vitrobot Mark IV  
689 instrument. The grids were blotted for 2.5 s at 100% humidity and 277 K before being plunge-  
690 frozen in liquid ethane cooled to 90 K. Specimen screening and optimization were performed  
691 using a Talos L120C 120 kV electron microscope equipped with a Ceta 16M CMOS camera.

692 High-resolution data were collected on a Thermo Fisher Scientific Titan Krios G3 300 kV  
693 microscope equipped with a Falcon 4 Direct Electron Detector. The data were collected at  
694 75000x nominal magnification, resulting in a calibrated pixel size of 1.03 Å. Each movie was  
695 recorded in counting mode with a 10 s exposure and saved in 30 fractions. The total exposure  
696 was 38 electrons per Å<sup>2</sup>. The data were collected with a 1.0-2.2  $\mu$ m defocus setting. A total of  
697 ~6431 movies were collected for the final high-resolution dataset.

698 Full-frame motion and local motion corrections of the cryo-EM movies were performed  
699 using implementations of the alignframes\_Imbfgs algorithm (Rubinstein and Brubaker, 2015) in

700 cryoSPARC v2 (Punjani et al., 2017). CTF parameters were estimated using GCTF (Zhang,  
701 2016). Particle selection was initially performed using a Gaussian blob picker, then by Topaz  
702 neural network picking (Bepler et al., 2019), both in cryoSPARC v2. Two-dimensional  
703 classification of the particle images was performed using cryoSPARC v2. The particle images  
704 corresponding to Fab-S-protein complexes in the different conformations were separated by  
705 performing heterogenous refinement in cryoSPARC v2. Initial map generation and homogenous,  
706 heterogenous and non-uniform three-dimensional refinements were performed in cryoSPARC  
707 v2. For the map with three RBDs in the up conformation, the three-dimensional refinements were  
708 carried out with either C1 or C3 symmetry imposed. The maps generated with C3 symmetry were  
709 used for model building. A previously reported SARS-CoV-2 spike structure, PDB entry 6VXX  
710 (Walls et al., 2020), and the 15033-7:RBD complex reported here, were first docked into the map  
711 using UCSF Chimera (Pettersen et al., 2004) and then manually modified using Coot (Emsley  
712 and Cowtan, 2004). The HV-LV and HC1-LC domains of the Fab were docked individually to  
713 account for elbow angle differences (SI Figure ZFH). The resulting model was refined with C3  
714 symmetry against the cryo-EM map using Rosetta (Wang et al., 2016) and Phenix (Liebschner et  
715 al., 2019). The resulting C3-symmetric model was used as starting model to build the other three  
716 structures, which were also refined against the corresponding cryo-EM maps using Rosetta and  
717 Phenix. The atomic models were validated using Molprobit (Williams et al., 2018) and the  
718 comprehensive validation (cryo-EM) tool in Phenix (Liebschner et al., 2019). To improve the  
719 interpretability of the Fab-RBD interaction, local refinement of the Fab-RBD unit was performed  
720 in cryoSPARC v2 using a mask encompassing one of the Fab-RBD units in the C3-symmetric  
721 structure. Moderate resolution improvement for the Fab-RBD unit was achieved (**Fig. S2H**).

722

### 723 **Data deposition**

724 The crystal structures of the RBD-Fab 15033 and RBD-Fab 15033-7 complexes were deposited  
725 in the PDB with accession codes 7KLG and 7KLH, respectively. The S-protein-Fab 15033-7 cryo-  
726 EM maps and structures were deposited to EMDB and PDB with the following accession codes:  
727 EMD-22925/PDB:7KMK (2 Fab bound, 2-"up"-1-"down"), EMD-22926/PDB:7KML (3 Fab bound,  
728 3-"up", C3-symmetric), EMD-23064/PDB:7KXJ (3 Fab bound, 3-"up" asymmetric), EMD-  
729 23065/PDB:7KXK (3 Fab bound, 2-"up", 1-"down").

730

731

732

733 **SUPPLEMENTAL INFORMATION**

734

735 **Table S1. X-ray data collection and refinement statistics**

736

737 **Table S2. Cryo-EM data collection and image processing**

738

739 **Figure S1. 2D class averages and resolution plots of the four 15033-7 Fab-S-protein cryo-**  
740 **EM structures.** The GSFSC curve, selected 2D class averages and the local resolution map are  
741 shown for each of the four structures: **A)** the 3-Fab-bound, 3-"up", C3 symmetric structure; **B)** the  
742 3-Fab-bound, 3-"up", asymmetric structure; **C)** the 3-Fab-bound, 2-"up"-1-"down" structure; **D)**  
743 the 2-Fab-bound, 2-"up" structure.

744

745 **Figure S2. Cryo-EM maps showing only Fabs and RBDs in the density. A-D)** The 15033-7  
746 Fabs (colored ribbons) are shown in the cryo-EM maps for each of the four structures: **A)** the 3-  
747 Fab-bound, 3-"up", C3 symmetric structure; **B)** the 3-Fab-bound, 3-"up", asymmetric structure; **C)**  
748 the 3-Fab-bound, 2-"up"-1-"down" structure; "A", "B" and "C" label the three Fab-RBD units where  
749 "C" is in the "down" conformation, "A" stacks over "C" and "B" is the Fab-RBD unit pushed away  
750 from the 3-fold rotation axis; **D)** the 2-Fab-bound, 2-"up" structure; **E)** A top view of the "B" Fab-  
751 RBD unit (Fab, orange; RBD, green) shown in **C)**. **F)** Comparison of the 15033-7 Fab-RBD unit  
752 found in the C3 symmetric cryo-EM structure (Fab, blue; RBD, green) with that found in the crystal  
753 structure (Fab and RBD, gray). A change in the Fab elbow angle is observed. **G)** The Fab-RBD  
754 unit in the C3 symmetric cryo-EM map, showing two views. **H)** Local-refinement map of the 15033-  
755 7 Fab-RBD unit, showing two views. In **G)** and **H)** the Fab heavy chain, Fab light chain and the  
756 RBD are colored blue, magenta and green, respectively.



757

758

759 **Figure S3. Thermostability of IgGs and tetravalent nAbs.** Thermal melt curves obtained by  
760 monitoring the fluorescence of Sypro orange in the presence of 1  $\mu$ M antibody from 44 - 100  $^{\circ}$ C  
761 and the relative fluorescence intensity baseline shifted to zero. Vertical bars mark the point of  
762 inflection in each curve indicating the  $T_M$ .

763

764 **Figure S4. Antibody-mediated neutralization of clinically isolated SARS-CoV-2** Infection of  
765 VeroE6 cells by a clinically-isolated SARS CoV2 virus (strain 2019 n-CoV/USA\_WA1/2020) was  
766 measured over a range [IgG] versus an IgG isotype control antibody using a focal reduction  
767 neutralization assay. Relative infection determined from the number of detectable foci was plotted  
768 versus log-transformed [IgG] and plots fit to determine  $IC_{50}$  values.

769

770 **Figure S5. Vulnerabilities of antibody-mediated neutralization to potential escape mutants.**  
771 **(A)** RBD residues individually mutated to alanine are indicated by spheres and labeled with the  
772 residue number. Those variants that exhibited reduced infection >75% relative to the wt are shown  
773 in dark grey and were not included in the analysis; those that exhibited at least 25% infectivity but  
774 could be neutralized >95% by 50 nM IgG 15033 are shown in light grey and those that retained  
775 infectivity but exhibited <95% neutralization of infection by 50 nM IgG 15033 are shown in red.  
776 **(B)** Residue Phe486 and Fab CDR residues within 4  $\text{\AA}$  of it are shown from the crystal structure  
777 of the complex of Fab 15033-7 and the SARS CoV-2 RBD. **(C)** Surface view of Fab 15033-7 in  
778 complex with the RBD reveals that residues in **(B)** form a hydrophobic pocket between the heavy  
779 and light chain, into which Phe486 inserts.

780

781 **Figure S6. A negative stain micrograph of the Fab-IgG-S-protein complex** The Fab-IgG-S-  
782 protein complexes are indicated by open brackets. Unbound Fab-IgG molecules are indicated by  
783 white arrowheads. The micrograph is contrast-inverted to help visualization.

784

785 **Figure S7. Negative stain EM particle images of the Fab-IgG-S-protein complexes** Each  
786 panel contains a Fab-IgG-S-protein complex observed in negative stain EM micrographs. Each  
787 particle is aligned so that the spike portion is upright. The images are contrast-inverted to help  
788 visualization.

789

790

791

792

793 **REFERENCES**

- 794 Afonine, P. V., Grosse-Kunstleve, R.W., Echols, N., Headd, J.J., Moriarty, N.W., Mustyakimov, M.,  
795 Terwilliger, T.C., Urzhumtsev, A., Zwart, P.H., and Adams, P.D. (2012). Towards automated  
796 crystallographic structure refinement with phenix.refine. *Acta Crystallogr. Sect. D Biol.*  
797 *Crystallogr.* *68*, 352–367.
- 798 Alsoussi, W.B., Turner, J.S., Case, J.B., Zhao, H., Schmitz, A.J., Zhou, J.Q., Chen, R.E., Lei, T., Rizk,  
799 A.A., McIntire, K.M., et al. (2020). A Potently Neutralizing Antibody Protects Mice against SARS-  
800 CoV-2 Infection. *J. Immunol.* *205*, 915–922.
- 801 Barnes, C.O., Jette, C.A., Abernathy, M.E., Dam, K.M.A., Esswein, S.R., Gristick, H.B., Malyutin,  
802 A.G., Sharaf, N.G., Huey-Tubman, K.E., Lee, Y.E., et al. (2020). SARS-CoV-2 neutralizing antibody  
803 structures inform therapeutic strategies. *Nature*.
- 804 Beigel, J.H., Tomashek, K.M., Dodd, L.E., Mehta, A.K., Zingman, B.S., Kalil, A.C., Hohmann, E.,  
805 Chu, H.Y., Luetkemeyer, A., Kline, S., et al. (2020). Remdesivir for the Treatment of Covid-19 —  
806 Preliminary Report. *N. Engl. J. Med.*
- 807 Bepler, T., Morin, A., Rapp, M., Brasch, J., Shapiro, L., Noble, A.J., and Berger, B. (2019).  
808 Positive-unlabeled convolutional neural networks for particle picking in cryo-electron  
809 micrographs. *Nat. Methods* *16*, 1153–1160.
- 810 Boulware, D.R., Pullen, M.F., Bangdiwala, A.S., Pastick, K.A., Lofgren, S.M., Okafor, E.C., Skipper,  
811 C.P., Nascene, A.A., Nicol, M.R., Abassi, M., et al. (2020). A Randomized Trial of  
812 Hydroxychloroquine as Postexposure Prophylaxis for Covid-19. *N. Engl. J. Med.* *383*, 517–525.
- 813 Cao, L., Goreshnik, I., Coventry, B., Case, J.B., Miller, L., Kozodoy, L., Chen, R.E., Carter, L., Walls,  
814 A.C., Park, Y.J., et al. (2020a). De novo design of picomolar SARS-CoV-2 miniprotein inhibitors.  
815 *Science (80-. ).* *370*, 426–431.
- 816 Cao, Y., Su, B., Guo, X., Sun, W., Deng, Y., Bao, L., Zhu, Q., Zhang, X., Zheng, Y., Geng, C., et al.  
817 (2020b). Potent Neutralizing Antibodies against SARS-CoV-2 Identified by High-Throughput  
818 Single-Cell Sequencing of Convalescent Patients' B Cells. *Cell* *182*, 73-84.e16.
- 819 Case, J.B., Rothlauf, P.W., Chen, R.E., Liu, Z., Zhao, H., Kim, A.S., Bloyet, L.M., Zeng, Q., Tahan, S.,  
820 Droit, L., et al. (2020). Neutralizing Antibody and Soluble ACE2 Inhibition of a Replication-  
821 Competent VSV-SARS-CoV-2 and a Clinical Isolate of SARS-CoV-2. *Cell Host Microbe* *28*, 475-

822 485.e5.

823 Cobleigh, M.A., Vogel, C.L., Tripathy, D., Robert, N.J., Scholl, S., Fehrenbacher, L., Wolter, J.M.,  
824 Paton, V., Shak, S., Lieberman, G., et al. (1999). Multinational study of the efficacy and safety of  
825 humanized anti-HER2 monoclonal antibody in women who have HER2-overexpressing  
826 metastatic breast cancer that has progressed after chemotherapy for metastatic disease. *J. Clin.*  
827 *Oncol.* *17*, 2639–2648.

828 Corti, D., Zhao, J., Pedotti, M., Simonelli, L., Agnihothram, S., Fett, C., Fernandez-Rodriguez, B.,  
829 Foglierini, M., Agatic, G., Vanzetta, F., et al. (2015). Prophylactic and postexposure efficacy of a  
830 potent human monoclonal antibody against MERS coronavirus. *Proc. Natl. Acad. Sci. U. S. A.*  
831 *112*, 10473–10478.

832 Daszak, P., Olival, K.J., and Li, H. (2020). A strategy to prevent future epidemics similar to the  
833 2019-nCoV outbreak. *Biosaf. Heal.* *2*, 6–8.

834 Duan, K., Liu, B., Li, C., Zhang, H., Yu, T., Qu, J., Zhou, M., Chen, L., Meng, S., Hu, Y., et al. (2020).  
835 Effectiveness of convalescent plasma therapy in severe COVID-19 patients. *Proc. Natl. Acad. Sci.*  
836 *U. S. A.* *117*, 9490–9496.

837 Emsley, P., and Cowtan, K. (2004). Coot: Model-building tools for molecular graphics. *Acta*  
838 *Crystallogr. Sect. D Biol. Crystallogr.* *60*, 2126–2132.

839 Emsley, P., Lohkamp, B., Scott, W.G., and Cowtan, K. (2010). Features and development of Coot.  
840 *Acta Crystallogr. Sect. D Biol. Crystallogr.* *66*, 486–501.

841 Fairhead, M., and Howarth, M. (2015). Site-specific biotinylation of purified proteins using BirA.  
842 *Methods Mol. Biol.* *1266*, 171–184.

843 Greaney, A.J., Starr, T.N., Gilchuk, P., Zost, S.J., Binshtein, E., Loes, A.N., Hilton, S.K., Huddleston,  
844 J., Eguia, R., Crawford, K.H.D., et al. (2020). Complete Mapping of Mutations to the SARS-CoV-2  
845 Spike Receptor-Binding Domain that Escape Antibody Recognition. *Cell Host Microbe.*

846 Hansen, J., Baum, A., Pascal, K.E., Russo, V., Giordano, S., Wloga, E., Fulton, B.O., Yan, Y., Koon,  
847 K., Patel, K., et al. (2020). Studies in humanized mice and convalescent humans yield a SARS-  
848 CoV-2 antibody cocktail. *Science* *369*, 1010–1014.

849 Hoffmann, M., Kleine-Weber, H., Schroeder, S., Mü, M.A., Drosten, C., and Pö, S. (2020). SARS-  
850 CoV-2 Cell Entry Depends on ACE2 and TMPRSS2 and Is Blocked by a Clinically Proven Protease

851 Inhibitor. *Cell* *181*, 271-280.e8.

852 Hornsby, M., Paduch, M., Miersch, S., Sääf, A., Matsuguchi, T., Lee, B., Wypisniak, K., Doak, A.,  
853 King, D., Usatyuk, S., et al. (2015). A high through-put platform for recombinant antibodies to  
854 folded proteins. *Mol. Cell. Proteomics* *14*, 2833–2847.

855 Hsieh, C.L., Goldsmith, J.A., Schaub, J.M., DiVenere, A.M., Kuo, H.C., Javanmardi, K., Le, K.C.,  
856 Wrapp, D., Lee, A.G., Liu, Y., et al. (2020). Structure-based design of prefusion-stabilized SARS-  
857 CoV-2 spikes. *Science* (80-. ). *369*, 1501–1505.

858 Jain, T., Sun, T., Durand, S., Hall, A., Houston, N.R., Nett, J.H., Sharkey, B., Bobrowicz, B., Caffry,  
859 I., Yu, Y., et al. (2017). Biophysical properties of the clinical-stage antibody landscape. *Proc.*  
860 *Natl. Acad. Sci. U. S. A.* *114*, 944–949.

861 Jones, B.E., Brown-Augsburger, P.L., Corbett, K.S., Westendorf, K., Davies, J., Cujec, T.P.,  
862 Wiethoff, C.M., Blackbourne, J.L., Heinz, B.A., Foster, D., et al. Title: LY-CoV555, a rapidly  
863 isolated potent neutralizing antibody, provides protection in a non-human primate model of  
864 SARS-CoV-2 infection.

865 Kabsch, W. (2010). XDS. *Acta Crystallogr. D. Biol. Crystallogr.* *66*, 125–132.

866 Ke, Z., Oton, J., Qu, K., Cortese, M., Zila, V., McKeane, L., Nakane, T., Zivanov, J., Neufeldt, C.J.,  
867 Cerikan, B., et al. (2020). Structures and distributions of SARS-CoV-2 spike proteins on intact  
868 virions. *Nature* 1–7.

869 Klein, S., Cortese, M., Winter, S.L., Wachsmuth-Melm, M., Neufeldt, C.J., Cerikan, B., Stanifer,  
870 M.L., Boulant, S., Bartenschlager, R., and Chlanda, P. (2020). SARS-CoV-2 structure and  
871 replication characterized by in situ cryo-electron tomography. *BioRxiv* 2020.06.23.167064.

872 Lefranc, M.P., Pommié, C., Ruiz, M., Giudicelli, V., Foulquier, E., Truong, L., Thouvenin-Contet,  
873 V., and Lefranc, G. (2003). IMGT unique numbering for immunoglobulin and T cell receptor  
874 variable domains and Ig superfamily V-like domains. *Dev. Comp. Immunol.* *27*, 55–77.

875 Li, L., Zhang, W., Hu, Y., Tong, X., Zheng, S., Yang, J., Kong, Y., Ren, L., Wei, Q., Mei, H., et al.  
876 (2020). Effect of Convalescent Plasma Therapy on Time to Clinical Improvement in Patients  
877 With Severe and Life-threatening COVID-19: A Randomized Clinical Trial. *JAMA*.

878 Li, Z., Michael, I.P., Zhou, D., Nagy, A., and Rini, J.M. (2013). Simple piggyBac transposon-based  
879 mammalian cell expression system for inducible protein production. *Proc. Natl. Acad. Sci. U. S.*

880 A. *110*, 5004–5009.

881 Liebschner, D., Afonine, P. V., Baker, M.L., Bunkoczi, G., Chen, V.B., Croll, T.I., Hintze, B., Hung,  
882 L.W., Jain, S., McCoy, A.J., et al. (2019). Macromolecular structure determination using X-rays,  
883 neutrons and electrons: Recent developments in Phenix. *Acta Crystallogr. Sect. D Struct. Biol.*  
884 *75*, 861–877.

885 Liu, L., Wang, P., Nair, M.S., Yu, J., Rapp, M., Wang, Q., Luo, Y., Chan, J.F.W., Sahi, V., Figueroa,  
886 A., et al. (2020). Potent neutralizing antibodies against multiple epitopes on SARS-CoV-2 spike.  
887 *Nature* *584*, 450–456.

888 Long, Q.X., Tang, X.J., Shi, Q.L., Li, Q., Deng, H.J., Yuan, J., Hu, J.L., Xu, W., Zhang, Y., Lv, F.J., et al.  
889 (2020). Clinical and immunological assessment of asymptomatic SARS-CoV-2 infections. *Nat.*  
890 *Med.* *26*, 1200–1204.

891 McCoy, A.J., Grosse-Kunstleve, R.W., Adams, P.D., Winn, M.D., Storoni, L.C., and Read, R.J.  
892 (2007). Phaser crystallographic software. *J. Appl. Crystallogr.* *40*, 658–674.

893 Meulen, J. Ter, Bakker, A.B.H., Brink, E.N. Van Den, Weverling, G.J., Martina, B.E.E., Haagmans,  
894 B.L., Kuiken, T., Kruif, J. De, Preiser, W., Spaan, W., et al. (2004). Human monoclonal antibody as  
895 prophylaxis for SARS coronavirus infection in ferrets. *Lancet* *363*, 2139–2141.

896 Miersch, S., Maruthachalam, B.V., Geyer, C.R., and Sidhu, S.S. (2017). Structure-Directed and  
897 Tailored Diversity Synthetic Antibody Libraries Yield Novel Anti-EGFR Antagonists. *ACS Chem.*  
898 *Biol.* *12*, 1381–1389.

899 Mouquet, H., Scheid, J.F., Zoller, M.J., Krogsgaard, M., Ott, R.G., Shukair, S., Artyomov, M.N.,  
900 Pietzsch, J., Connors, M., Pereyra, F., et al. (2010). Polyreactivity increases the apparent affinity  
901 of anti-HIV antibodies by heterologation. *Nature* *467*, 591–595.

902 Niedziela-Majka, A., Kan, E., Weissburg, P., Mehra, U., Sellers, S., and Sakowicz, R. (2015). High-  
903 throughput screening of formulations to optimize the thermal stability of a therapeutic  
904 monoclonal antibody. *J. Biomol. Screen.* *20*, 552–559.

905 Noy-Porat, T., Makdasi, E., Alcalay, R., Mechaly, A., Levy, Y., Bercovich-Kinori, A., Zauberman, A.,  
906 Tamir, H., Yahalom-Ronen, Y., Israeli, M., et al. (2020). A panel of human neutralizing mAbs  
907 targeting SARS-CoV-2 spike at multiple epitopes. *Nat. Commun.* *11*, 1–7.

908 Pallesen, J., Wang, N., Corbett, K.S., Wrapp, D., Kirchdoerfer, R.N., Turner, H.L., Cottrell, C.A.,

909 Becker, M.M., Wang, L., Shi, W., et al. (2017). Immunogenicity and structures of a rationally  
910 designed prefusion MERS-CoV spike antigen. *Proc. Natl. Acad. Sci. U. S. A.* *114*, E7348–E7357.

911 Persson, H., Ye, W., Wernimont, A., Adams, J.J., Koide, A., Koide, S., Lam, R., and Sidhu, S.S.  
912 (2013). CDR-H3 diversity is not required for antigen recognition by synthetic antibodies. *J. Mol.*  
913 *Biol.* *425*, 803–811.

914 Pettersen, E.F., Goddard, T.D., Huang, C.C., Couch, G.S., Greenblatt, D.M., Meng, E.C., and  
915 Ferrin, T.E. (2004). UCSF Chimera - A visualization system for exploratory research and analysis.  
916 *J. Comput. Chem.* *25*, 1605–1612.

917 Pinto, D., Park, Y.-J., Beltramello, M., Walls, A.C., Tortorici, M.A., Bianchi, S., Jaconi, S., Culap, K.,  
918 Zatta, F., Marco, A. De, et al. Cross-neutralization of SARS-CoV-2 by a human monoclonal SARS-  
919 CoV antibody.

920 Poland, G.A., Ovsyannikova, I.G., and Kennedy, R.B. (2020). SARS-CoV-2 immunity: review and  
921 applications to phase 3 vaccine candidates. *Lancet* *396*, 1595–1606.

922 Punjani, A., Rubinstein, J.L., Fleet, D.J., and Brubaker, M.A. (2017). CryoSPARC: Algorithms for  
923 rapid unsupervised cryo-EM structure determination. *Nat. Methods* *14*, 290–296.

924 Robbiani, D.F., Gaebler, C., Muecksch, F., Lorenzi, J.C.C., Wang, Z., Cho, A., Agudelo, M., Barnes,  
925 C.O., Gazumyan, A., Finkin, S., et al. (2020). Convergent antibody responses to SARS-CoV-2 in  
926 convalescent individuals. *Nature* *584*, 437–442.

927 Robbins, P.W., Trimble, R.B., Wirth, D.F., Hering, C., Maley, F., Maley, G.F., Das, R.,  
928 Gibson, B.W., Roy, N., and Biemann, K. (1984). THE JOURNAL OF BIOLOGICAL CHEMISTRY  
929 Primary Structure of the Streptomyces Enzyme Endo- $\alpha$ -N-acetylglucosaminidase H\*.

930 Rogers, T.F., Zhao, F., Huang, D., Beutler, N., Burns, A., He, W.T., Limbo, O., Smith, C., Song, G.,  
931 Woehl, J., et al. (2020). Isolation of potent SARS-CoV-2 neutralizing antibodies and protection  
932 from disease in a small animal model. *Science* (80-. ). *369*, 956–963.

933 Rubinstein, J.L., and Brubaker, M.A. (2015). Alignment of cryo-EM movies of individual particles  
934 by optimization of image translations. *J. Struct. Biol.* *192*, 188–195.

935 Schoof, M., Faust, B., Saunders, R.A., Sangwan, S., Rezelj, V., Hoppe, N., Boone, M., Billesbølle,  
936 C.B., Puchades, C., Azumaya, C.M., et al. (2020). An ultrapotent synthetic nanobody neutralizes  
937 SARS-CoV-2 by stabilizing inactive Spike. *Science* (80-. ). eabe3255.

938 Schritt, D., Li, S., Rozewicki, J., Katoh, K., Yamashita, K., Volkmuth, W., Cavet, G., and Standley,  
939 D.M. (2019). Repertoire Builder: High-throughput structural modeling of B and T cell receptors.  
940 *Mol. Syst. Des. Eng.* 4, 761–768.

941 Shen, C., Wang, Z., Zhao, F., Yang, Y., Li, J., Yuan, J., Wang, F., Li, D., Yang, M., Xing, L., et al.  
942 (2020). Treatment of 5 Critically Ill Patients with COVID-19 with Convalescent Plasma. *JAMA - J.*  
943 *Am. Med. Assoc.* 323, 1582–1589.

944 Shi, Z., and Hu, Z. (2008). A review of studies on animal reservoirs of the SARS coronavirus.  
945 *Virus Res.* 133, 74–87.

946 Shi, R., Shan, C., Duan, X., Chen, Z., Liu, P., Song, J., Song, T., Bi, X., Han, C., Wu, L., et al. (2020).  
947 A human neutralizing antibody targets the receptor-binding site of SARS-CoV-2. *Nature* 584,  
948 120–124.

949 Sui, J., Li, W., Murakami, A., Tamin, A., Matthews, L.J., Wong, S.K., Moore, M.J., Tallarico, A.S.C.,  
950 Olurinde, M., Choe, H., et al. (2004). Potent neutralization of severe acute respiratory syndrome  
951 (SARS) coronavirus by a human mAb to S1 protein that blocks receptor association. *Proc. Natl.*  
952 *Acad. Sci. U. S. A.* 101, 2536–2541.

953 Tao, Y., Strelkov, S. V, Mesyanzhinov, V. V, and Rossmann, M.G. (1997). Structure of  
954 bacteriophage T4 fibritin: a segmented coiled coil and the role of the C-terminal domain.  
955 *Structure* 5, 789–798.

956 Walls, A.C., Park, Y.J., Tortorici, M.A., Wall, A., McGuire, A.T., and Velesler, D. (2020). Structure,  
957 Function, and Antigenicity of the SARS-CoV-2 Spike Glycoprotein. *Cell* 181, 281-292.e6.

958 Wan, J., Xing, S., Ding, L., Wang, Y., Gu, C., Wu, Y., Rong, B., Li, C., Wang, S., Chen, K., et al.  
959 (2020). Human-IgG-Neutralizing Monoclonal Antibodies Block the SARS-CoV-2 Infection. *Cell*  
960 *Rep.* 32.

961 Wang, R.Y.R., Song, Y., Barad, B.A., Cheng, Y., Fraser, J.S., and DiMaio, F. (2016). Automated  
962 structure refinement of macromolecular assemblies from cryo-EM maps using Rosetta. *Elife* 5.

963 Wec, A.Z., Wrapp, D., Herbert, A.S., Maurer, D.P., Haslwanter, D., Sakharkar, M., Jangra, R.K.,  
964 Dieterle, M.E., Lilov, A., Huang, D., et al. (2020). Broad neutralization of SARS-related viruses by  
965 human monoclonal antibodies. *Science* (80-. ). 369, 731–736.

966 Williams, C.J., Headd, J.J., Moriarty, N.W., Prisant, M.G., Videau, L.L., Deis, L.N., Verma, V.,



967 Keedy, D.A., Hintze, B.J., Chen, V.B., et al. (2018). MolProbity: More and better reference data  
968 for improved all-atom structure validation. *Protein Sci.* 27, 293–315.

969 Wu, Y., Wang, F., Shen, C., Peng, W., Li, D., Zhao, C., Li, Z., Li, S., Bi, Y., Yang, Y., et al. (2020). A  
970 noncompeting pair of human neutralizing antibodies block COVID-19 virus binding to its  
971 receptor ACE2. *Science* (80- ). eabc2241.

972 Yuan, M., Wu, N.C., Zhu, X., Lee, C.C.D., So, R.T.Y., Lv, H., Mok, C.K.P., and Wilson, I.A. (2020). A  
973 highly conserved cryptic epitope in the receptor binding domains of SARS-CoV-2 and SARS-CoV.  
974 *Science* 368, 630–633.

975 Zhang, K. (2016). Gctf: Real-time CTF determination and correction. *J. Struct. Biol.* 193, 1–12.

976 Zhu, Z., Chakraborti, S., He, Y., Roberts, A., Sheahan, T., Xiao, D., Hensley, L.E., Prabakaran, P.,  
977 Rockx, B., Sidorov, I.A., et al. (2007). Potent cross-reactive neutralization of SARS coronavirus  
978 isolates by human monoclonal antibodies. *Proc. Natl. Acad. Sci. U. S. A.* 104, 12123–12128.

979 Zost, S.J., Gilchuk, P., Chen, R.E., Case, J.B., Reidy, J.X., Trivette, A., Nargi, R.S., Sutton, R.E.,  
980 Suryadevara, N., Chen, E.C., et al. (2020). Rapid isolation and profiling of a diverse panel of  
981 human monoclonal antibodies targeting the SARS-CoV-2 spike protein. *Nat. Med.* 26, 1422–  
982 1427.

983

984

985

986

987

988



**Figure 2**

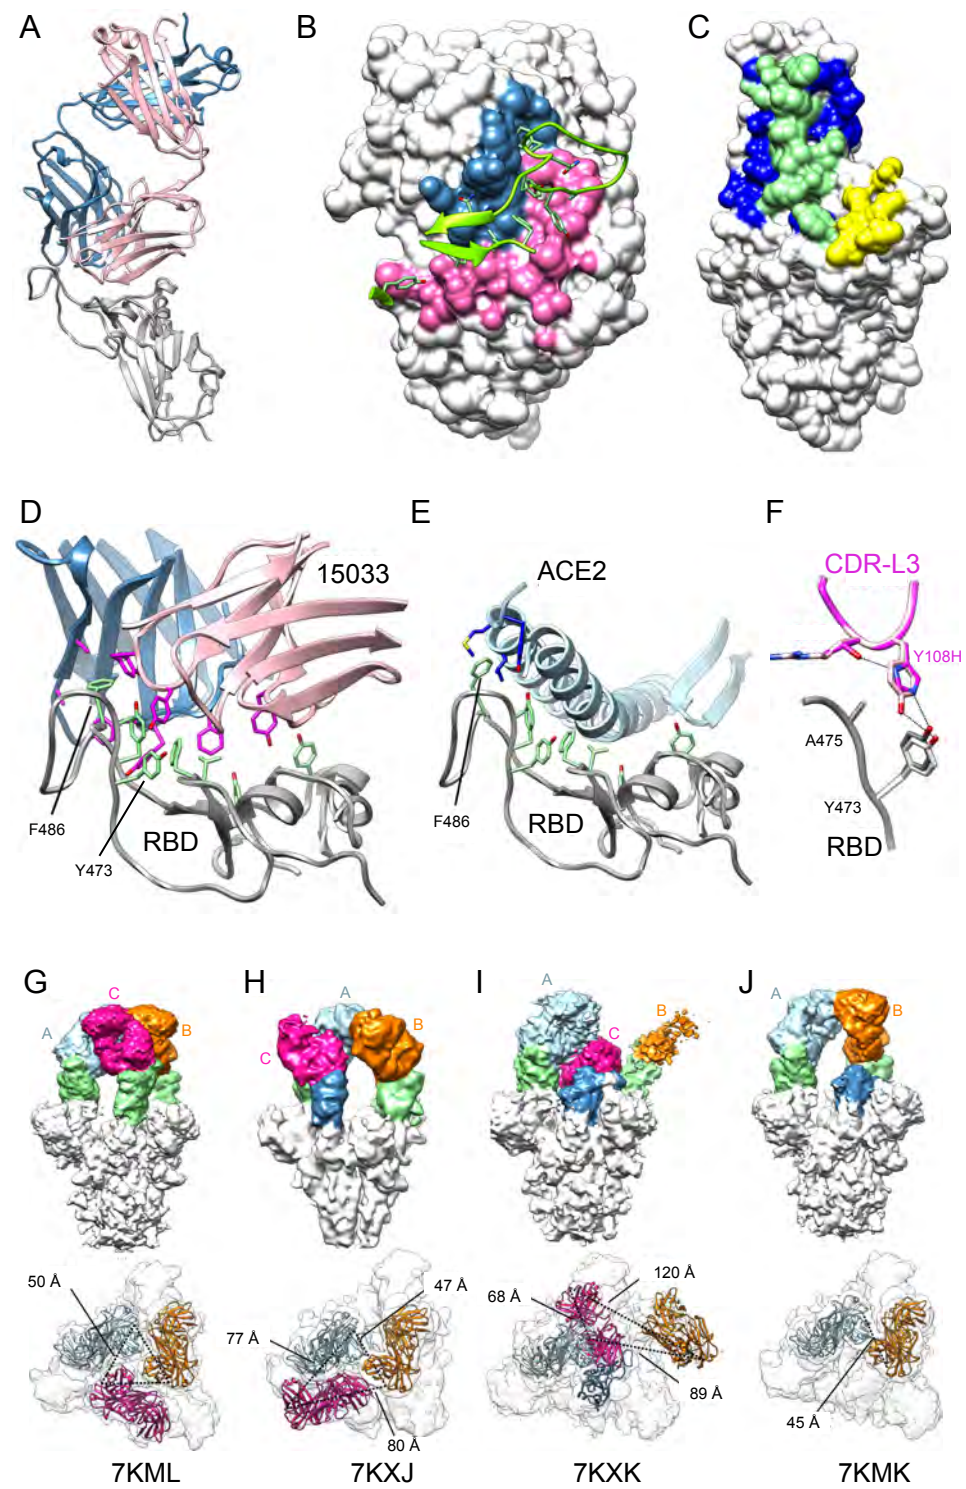

# Figure 3

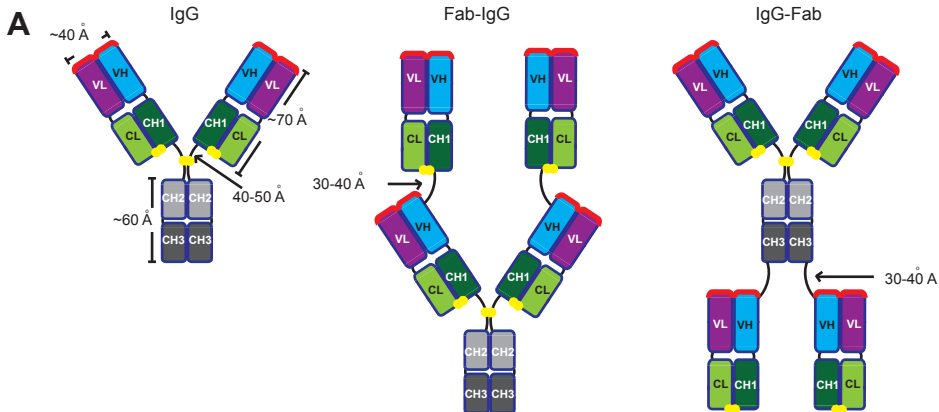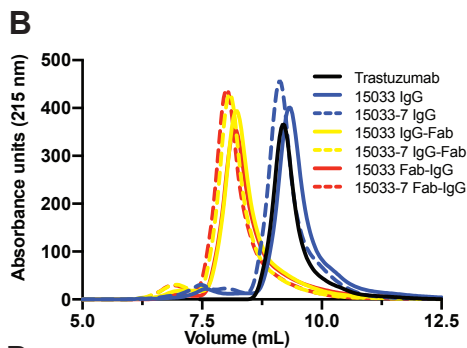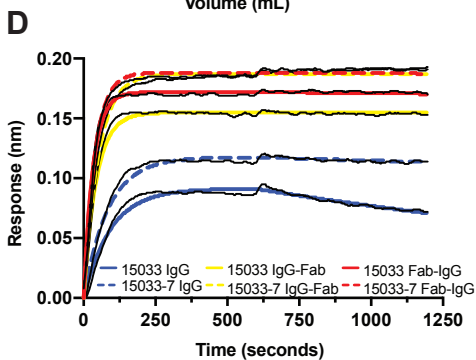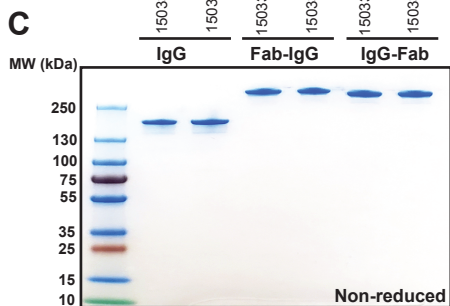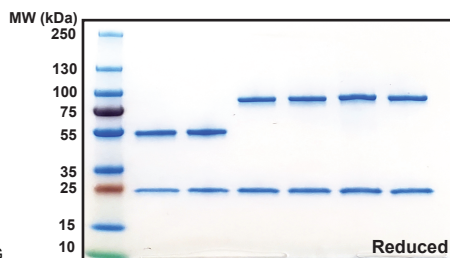

**Figure 4**

**A**

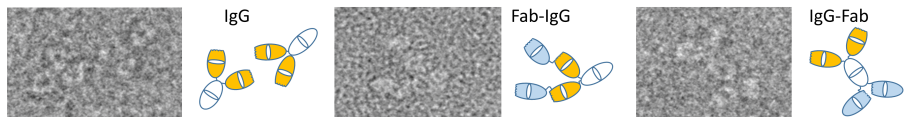

**B**

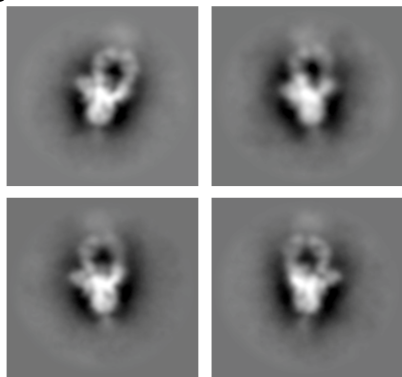

**C**

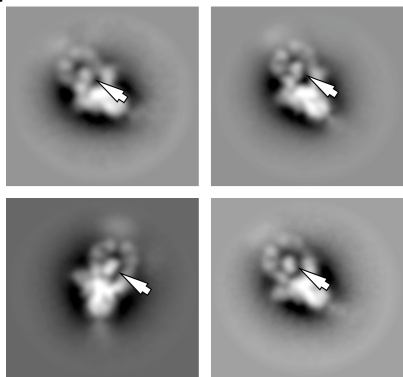

**D**

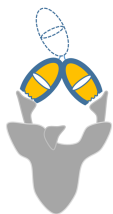

**E**

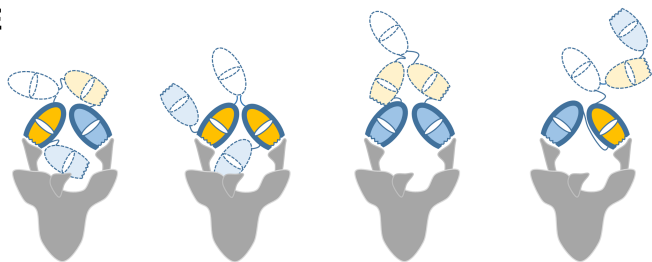

# Figure 5

## A

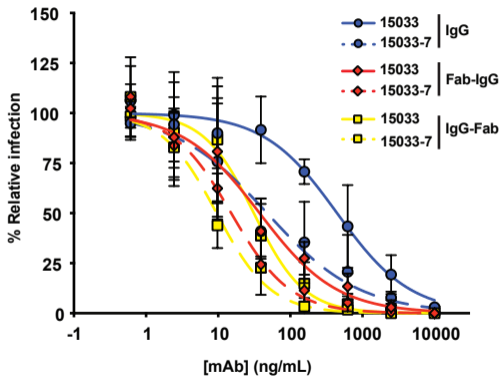

## B

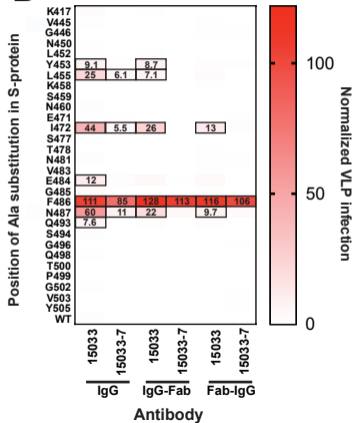

Source: https://www.biorxiv.org/content/10.1101/2020.10.31.362848v2.full.pdf
